# Supplementary material
Source: Springer Nature journal article supplement (https://www.springermedizin.de/resource/supplementary/13722_2012_135_MOESM3_ESM.pdf/9675094)
Supplement: MOESM3 [file 9675094]

| Question                                                                                                                                        | Yes | No |
|-------------------------------------------------------------------------------------------------------------------------------------------------|-----|----|
| 1. Discussed the goal that the woman chose for the prior month                                                                                  |     |    |
| 2. Reviewed the work book (how the woman was doing in regard to her goal of pregnancy planning or contraception, successes and/or difficulties) |     |    |
| 3. The woman plans pregnancy:<br>Recommended preparations for pregnancy                                                                         |     |    |
| 4. The woman plans pregnancy:<br>Recommended complete abstinence from alcohol                                                                   |     |    |
| 5. The woman plans to use contraception:<br>Recommended effective contraception                                                                 |     |    |
| 4. The woman plans to use contraception:<br>Recommended responsible drinking                                                                    |     |    |
| 5. Demonstrated support and willingness to help                                                                                                 |     |    |
| 6. If a referral was made, specify to which specialist she was referred                                                                         |     |    |
